# Supplementary material for: In Vivo Validation of Novel Synthetic tbp1 Peptide-Based Vaccine Candidates against Haemophilus influenzae Strains in BALB/c Mice
Source: MDPI journal article supplement (doi:10.3390/vaccines11111651), 2023-10-27
Supplement: s1 [file s1]

## In-vivo Validation of Novel Synthetic *tbp1* Peptide-Based Vaccine Candidates against *Haemophilus influenzae* Strains in BALB/c Mice

### Supplementary Data

**Supplementary Table S1.** Summary of Physical and Chemical Analysis Results (Bibi et al., 2021) [35]

|                       | Pal omp6 | Gdh          | Tbp1         | PilW typeIV  | Porin OmpA   |
|-----------------------|----------|--------------|--------------|--------------|--------------|
| Gene Size (bp)        | 462      | 1350         | 2739         | 540          | 1062         |
| Protein size (aa)     | 153      | 449          | 912          | 179          | 353          |
| M. W (kDa)            | 16       | 48           | 103          | 20           | 37           |
| pI Value              | 6.09     | 6.20         | 9.34         | 8.36         | 9.62         |
| VaxiJen score         | 0.1642   | 0.5364       | 0.5989       | 0.6058       | 0.6150       |
| Allergen non-allergen | Allergen | Non-Allergen | Non-Allergen | Non-Allergen | Non-Allergen |
| Helices <2            | zero     | zero         | zero         | zero         | zero         |
| Estimated half-life   | 30hrs    | 30hrs        | 30hrs        | 30hrs        | 30hrs        |
| Instability index     | 24.62    | 23.55        | 38.14        | 46.99        | 20.48        |
| Aliphatic index       | 79.87    | 82.38        | 71.24        | 82.40        | 82.75        |
| Non-Homologous        | yes      | yes          | yes          | yes          | yes          |

**Supplementary Table S2.** Nine selected epitopes based on the best scores values (Bibi et al., 2021) [35]

| Protein    | Epitope | B-Cell Epitopes       | T cell epitope | Binding energy score kcal/mol | VaxiJen score | Ic50< 100nm |
|------------|---------|-----------------------|----------------|-------------------------------|---------------|-------------|
| Pal OMP P6 | P E1    | AACSSSNNDAAAGNGAAQTFG | CSSSNNDAA      | -5.4                          | 1.4973        | 31          |
| Gdh        | G E1    | ADVLFPGKAAANAGGVATSG  | VLFGPGKAA      | -6.2                          | 0.9723        | 38          |
|            | G E2    | TTLPMGGAKGGSDFDPKGKS  | TTLPMGGAK      | -5.1                          | 1.0268        | 38          |
|            | G E3    | HVGADTDVPAGDIGVGGREV  | DTDVPAGDI      | -6.4                          | 1.3879        | 39          |
|            | T E1    | CTNGYESCKKSPKPPAKLST  | CTNGYESCK      | -7.2                          | 0.9685        | 40          |
| Tbp1       | T E2    | SNPYLYPKPEPYFAGGDLN   | YLYPKPEPY      | -7.8                          | 0.4609        | 40          |
|            | T E3    | LSKNGTGKGNYGYNHNAQNAK | GTGKGNYG       | -6.8                          | 1.3176        | 35          |
| PilW       | PW E1   | EQAQQQFELALNSPNYYHQA  | AQQQFELAL      | -5.4                          | 0.7423        | 41          |
| Porin      | PorinE1 | DAISATGYGKANPVTGATCD  | KANVTGAT       | -5.8                          | 0.9864        | 41          |

#### Reference:

Bibi, N., Zaidi, N. S., Tahir, M., & Babar, M. M. (2021). Vaccinomics-driven proteome-wide screening of *Haemophilus influenzae* for the prediction of common putative vaccine candidates. *Can J Microbiol*, 67(11), 799-812. <https://doi.org/10.1139/cjm-2020-0535>
